# Supplementary material for: Decoding the genetic and chemical basis of sexual attractiveness in parasitic wasps
Source: eLife journal article supplement (doi:10.7554/elife.86182), 2023-07-11
Supplement: supp [file elife-86182-supp-v1.zip]

Genes, NCBI Nasonia vitripennis Annotation Release 104, 2020-03-01

Genomic map showing the *fas5* and *fas6* gene clusters. The *fas5* gene (LOC100678737) is located on the positive strand, and the *fas6* gene (LOC100124027) is located on the negative strand. The map displays the genomic coordinates (21,840 K to 21,805 K) and the gene structure (exons and introns) for both genes. The *fas5* gene structure is shown with green boxes representing exons and lines with arrows representing introns and the direction of transcription. The *fas6* gene structure is shown with green boxes representing exons and lines with arrows representing introns and the direction of transcription. The map also shows the locations of the Fas5 and Fas6 proteins, indicated by green arrows pointing to the right.

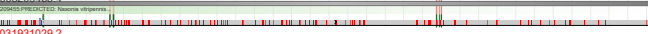

Sequence XM\_008209455.4

(U) BLAST Results for XM\_008209455.PREDICTED: *Nasoria vitripennis*

Sequence XM\_031931029.2

(U) BLAST Results for XM\_008209455.PREDICTED: *Nasoria vitripennis*

(U) BLAST Results for XM\_008209455.PREDICTED: *Nasoria vitripennis*
