# Supplementary material for: Decoding the genetic and chemical basis of sexual attractiveness in parasitic wasps
Source: eLife journal article supplement (doi:10.7554/elife.86182), 2023-07-11
Supplement: supp [file elife_poa_e86182_Figure_4_source_data_1.xlsx]

## Sheet: Sheet 1
Compound class	Fas5 RNAi female
	After separation	Before separation
n-alkane (%)	0.42 ± 0.02	13.08 ± 0.41
n-alkene (%)	0.94 ± 0.01	3.81 ± 0.21
Methyl-branched alkane (%)	98.65 ± 0.03	83.11 ± 0.55
