# Supplementary figures and images for: Decoding the genetic and chemical basis of sexual attractiveness in parasitic wasps
Source: eLife journal article supplement (doi:10.7554/elife.86182), 2023-07-11

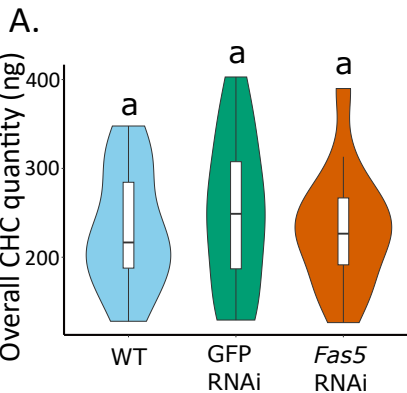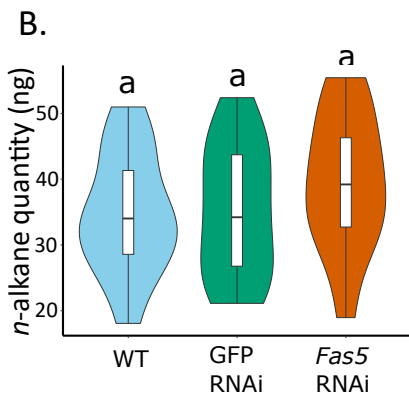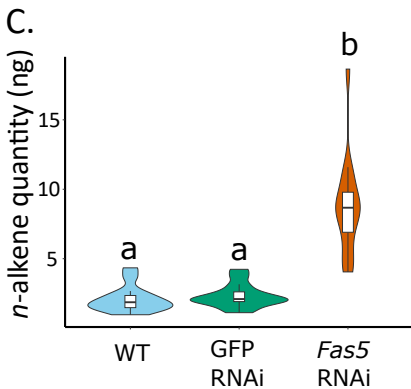

Supplement: supp [file elife-86182-supp-v1.zip]

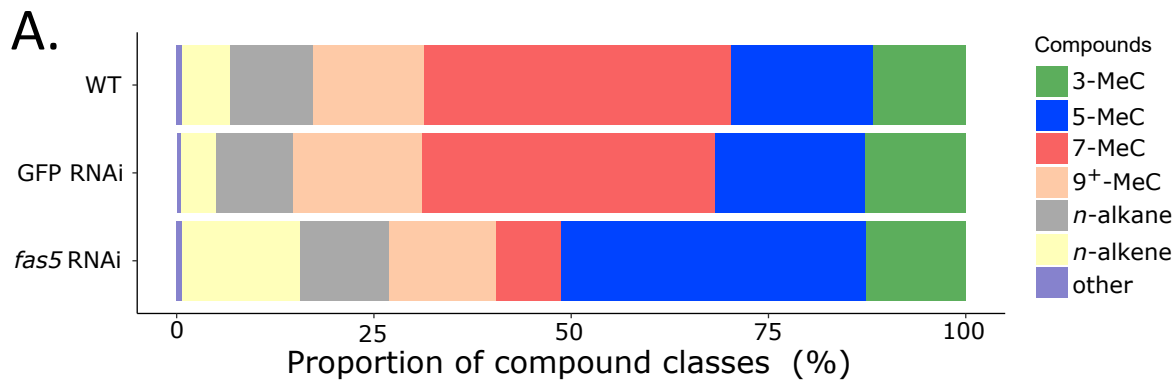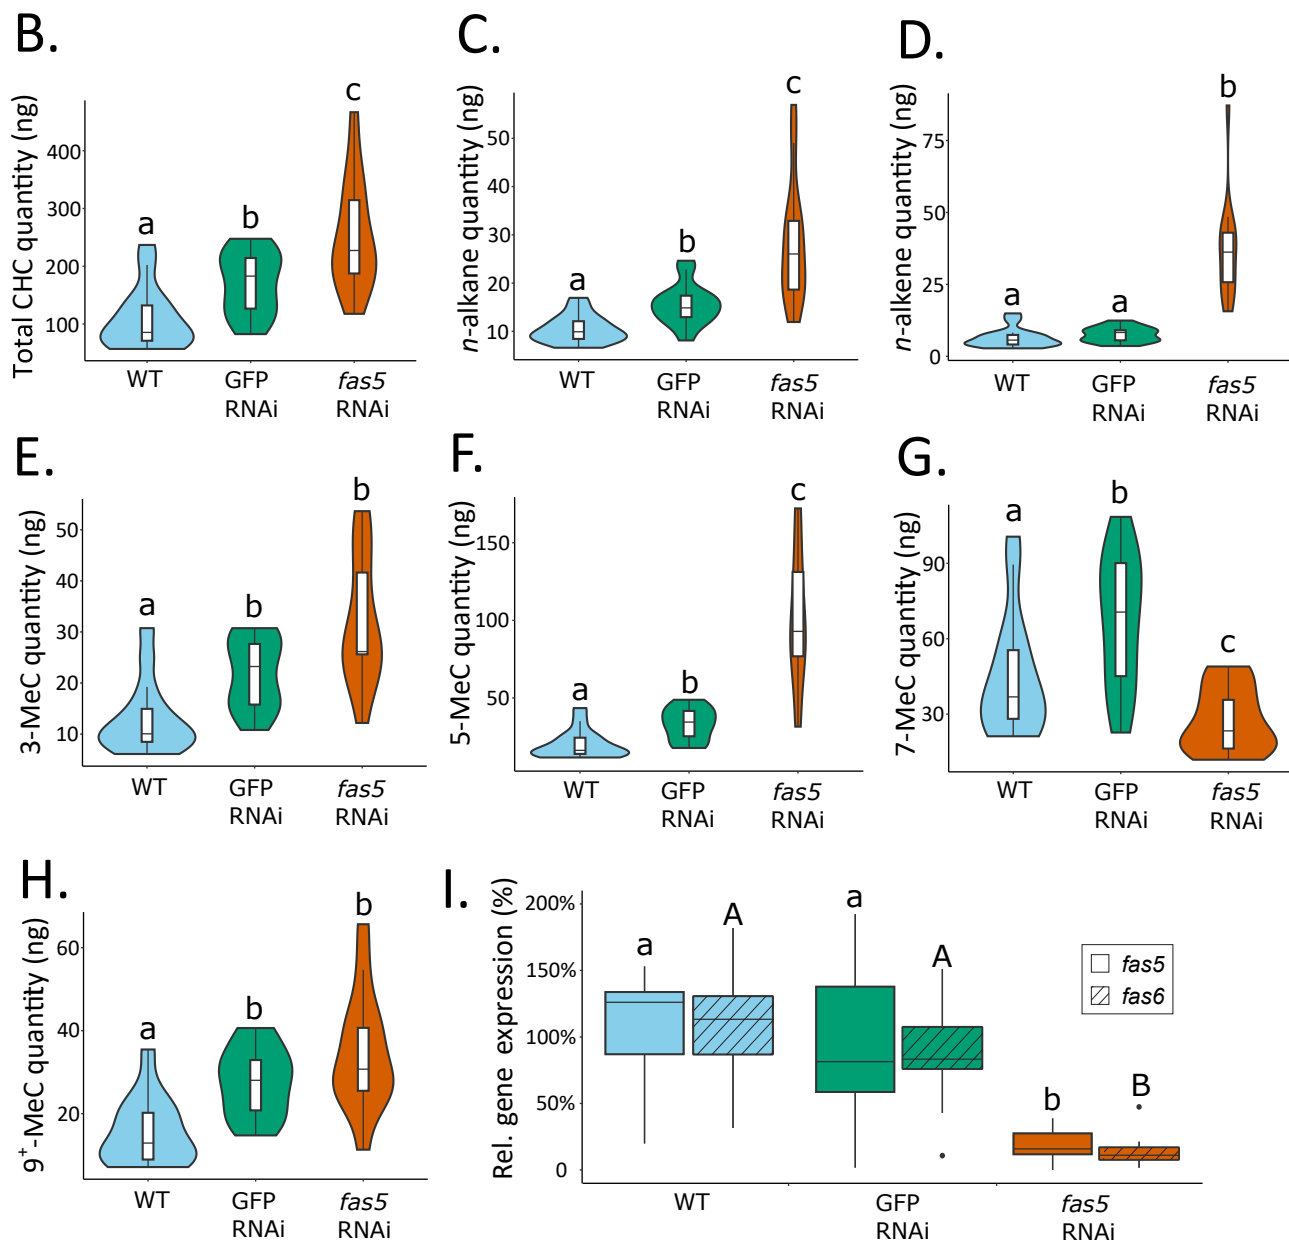

Supplement: supp [file elife-86182-supp-v1.zip]

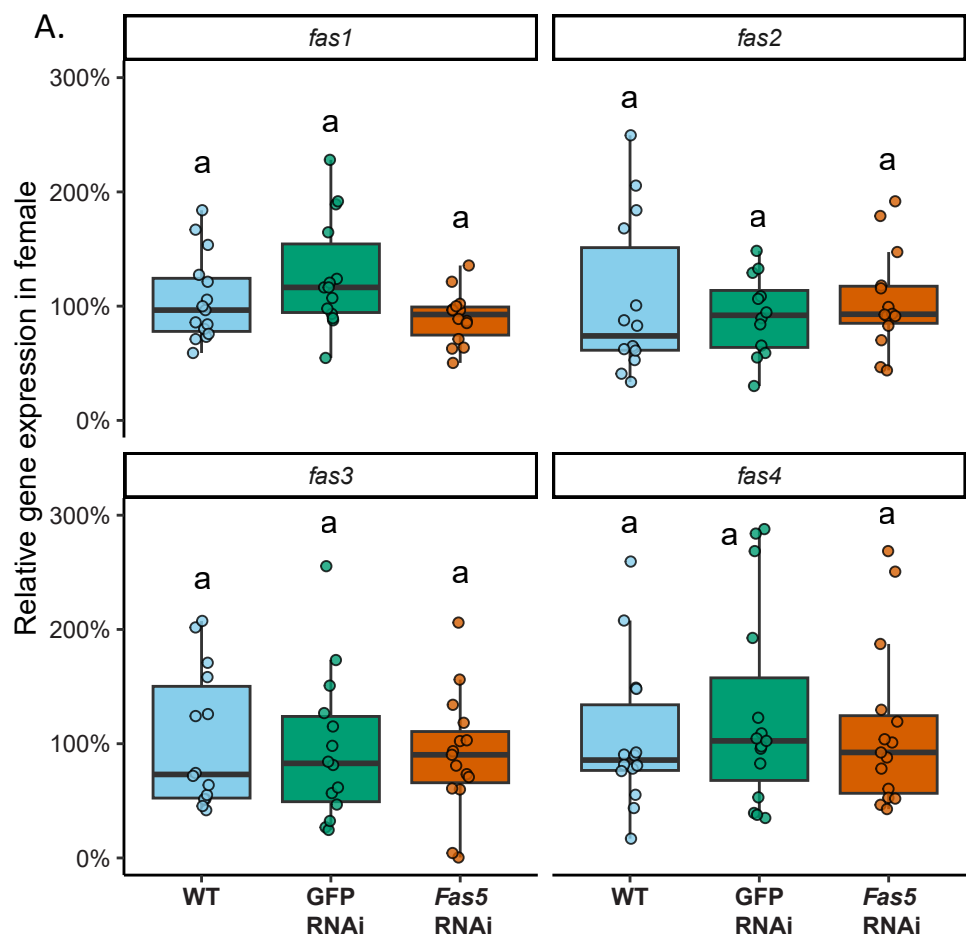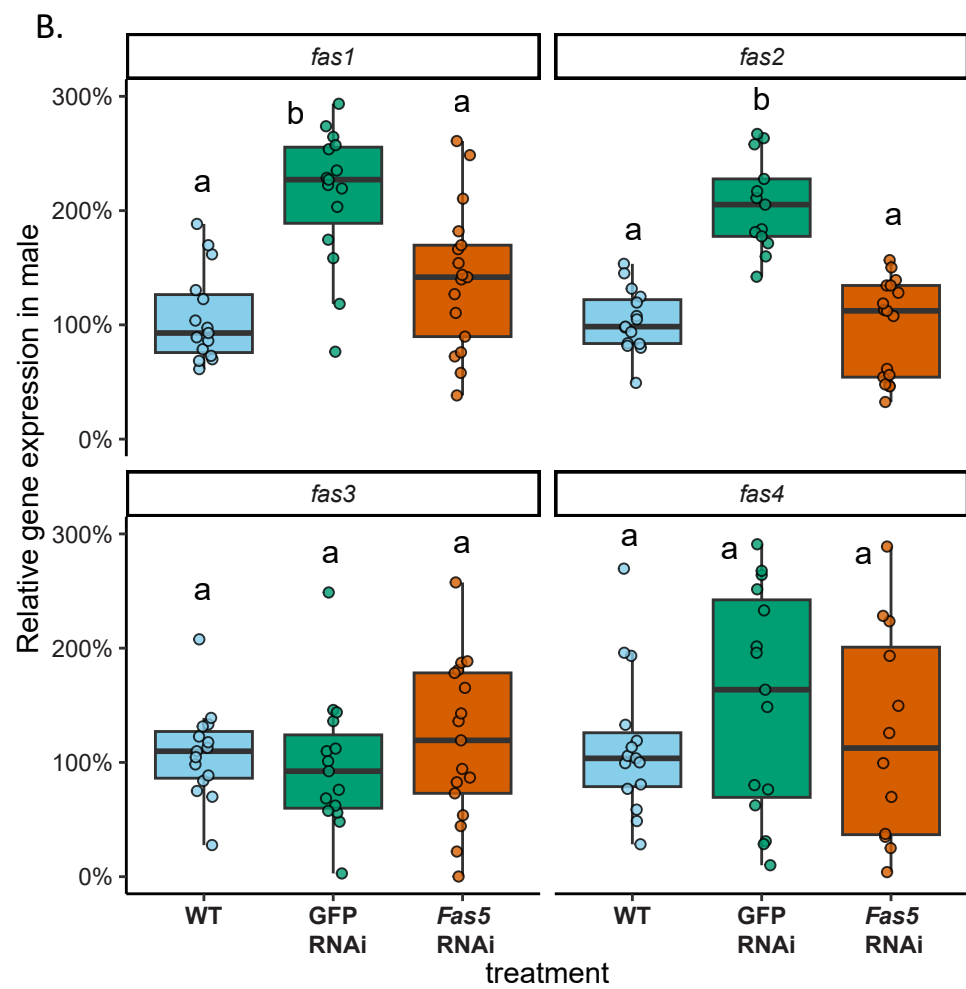

Supplement: supp [file elife-86182-supp-v1.zip]
